# Supplementary material for: Biogenic fabrication of a gold nanoparticle sensor for detection of Fe3+ ions using a smartphone and machine learning
Source: Royal Society of Chemistry journal article supplement (doi:10.1039/d4ra03265a), 2024-01-01
Supplement: d4ra03265a1.pdf [file d4ra03265a1.pdf]

# Biogenic fabrication of gold nanoparticles sensor for detection of Fe<sup>3+</sup> ion using smartphone and machine learning

Kim-Phuong T. Dang<sup>1†</sup>, T. Thanh-Giang Nguyen<sup>1†</sup>, Tien-Dung Cao<sup>2\*</sup>, Van-Dung Le<sup>1,3</sup>, Chi-Hien Dang<sup>1,3</sup>, Nguyen Phuc Hoang Duy<sup>1</sup>, Pham Thi Thuy Phuong<sup>1,3</sup>, Do Manh Huy<sup>1</sup>, Tran Thi Kim Chi<sup>4</sup>, Thanh-Danh Nguyen<sup>1,3\*</sup>

<sup>1</sup>Institute of Chemical Technology, Vietnam Academy of Science and Technology, Ho Chi Minh City, Vietnam.

<sup>2</sup>School of Information Technology, Tan Tao University, Long An, Vietnam.

<sup>3</sup>Graduate University of Science and Technology, Vietnam Academy of Science and Technology, 18 Hoang Quoc Viet, Cau Giay, Hanoi 11000, Viet Nam.

<sup>4</sup>Institute of Materials Science, Vietnam Academy of Science and Technology, 18 Hoang Quoc Viet, Cau Giay District, Hanoi, Vietnam.

\*Corresponding author: [dung.cao@ttu.edu.vn](mailto:dung.cao@ttu.edu.vn) (T.D. Cao); [ntdanh@ict.vast.vn](mailto:ntdanh@ict.vast.vn) and [danh5463bd@yahoo.com](mailto:danh5463bd@yahoo.com) (T.D. Nguyen)

**Keywords:** gold nanoparticles; plant extract; smartphone; machine learning; iron ion; biogenic sensor.

†*These authors contributed equally to this work and share first authorship.*

## Supporting Information

**Table S1.** XRD data of EB-AuNPs

| No. | 2 $\theta$<br>(deg) | $\theta$ (Radian) | Cos $\theta$<br>(deg) | FWHM<br>(degree) | $\beta$ radian | Crystalline<br>size (nm) | Interplanar<br>spacing 'd'<br>(Å) | h k l<br>Identified<br>from<br>peak | h <sup>2</sup> +k <sup>2</sup><br>+l <sup>2</sup> | Lattice<br>const.<br>'a' from<br>'d' Å | Cell<br>volume Å <sup>3</sup> |
|-----|---------------------|-------------------|-----------------------|------------------|----------------|--------------------------|-----------------------------------|-------------------------------------|---------------------------------------------------|----------------------------------------|-------------------------------|
| 1   | 38.1773             | 0.333159792       | 0.94501371            | 1.1058           | 0.01929985     | 7.60221835               | 2.35662                           | 1 1 1                               | 3                                                 | 4.08178557                             | 68.0065212                    |
| 2   | 44.2595             | 0.386237          | 0.92633316            | 1.7233           | 0.03007726     | 4.97653357               | 2.04483                           | 2 0 0                               | 4                                                 | 4.08966                                | 68.4008678                    |
| 3   | 64.6628             | 0.564289381       | 0.84496886            | 1.525            | 0.02661627     | 6.16516191               | 1.4411                            | 2 2 0                               | 8                                                 | 4.07604633                             | 67.7200601                    |
| 4   | 77.5417             | 0.676678986       | 0.77965666            | 1.48             | 0.02583087     | 6.88477781               | 1.2301                            | 3 1 1                               | 11                                                | 4.07978015                             | 67.9063337                    |

Editors and reviewers can access data and code via following link:

[https://drive.google.com/drive/folders/1tQyQl5mwPFAykSaXsfDMMOPpbCy\\_dPRA?fbclid=IwAR3-7442iYdZfW0O3MXQPqufT5\\_u9\\_0s1xYs3vAHluyk\\_dKjOuZG4NrT1v0\\_aem\\_AeF\\_mb2biOu5oJelm1u5peqz0oXL0ksO1IMZvWwxyOsfDPpBAbHKMojdUisTh7OkG29XtC1BM2i8JD1tQNvoAxeH](https://drive.google.com/drive/folders/1tQyQl5mwPFAykSaXsfDMMOPpbCy_dPRA?fbclid=IwAR3-7442iYdZfW0O3MXQPqufT5_u9_0s1xYs3vAHluyk_dKjOuZG4NrT1v0_aem_AeF_mb2biOu5oJelm1u5peqz0oXL0ksO1IMZvWwxyOsfDPpBAbHKMojdUisTh7OkG29XtC1BM2i8JD1tQNvoAxeH)
